# Supplementary material for: Asymmetrical hole/electron transport in donor–acceptor mixed-stack cocrystals
Source: Royal Society of Chemistry journal article supplement (doi:10.1039/c8tc05190a), 2018-12-11
Supplement: c8tc05190a1.pdf [file c8tc05190a1.pdf]

## Supporting Information

### Asymmetrical Hole/Electron Transport in Donor-Acceptor Mixed-Stack Cocrystals

*Ryonosuke Sato, Tadashi Kawamoto and Takehiko Mori*

#### Single crystal structures

The diffraction data of (3T)(TCNQ), (4T)(TCNQ), and (4T)(F<sub>4</sub>TCNQ) were collected by a Rigaku four-circle diffractometer (AFC-7R) with graphite-monochromatized MoK $\alpha$  radiation ( $\lambda = 0.71069$  Å). The X-ray oscillation photographs of (4T)(F<sub>2</sub>TCNQ) were taken using a RIGAKU R-Axis RAPID II imaging plate with CuK $\alpha$  radiation from a rotation anode source with a confocal multilayer X-ray mirror (RIGAKU VM-Spider,  $\lambda = 1.54187$  Å). The structures were solved by the direct method (SHELXT) and refined by the full-matrix least-squares method by applying anisotropic temperature factors for all non-hydrogen atoms using the SHELXL programs.<sup>S1,S2</sup>

The crystal data are listed in Table S1. Crystal structure of (3T)(TCNQ) has been previously solved under the assumption of  $P2_1/n$ , in which the 3T molecule is located on an inversion center.<sup>50</sup> The 3T molecule has two possible orientations (Fig. S1(b)). We can solve the structure with the space group of  $C2/m$ . Here, 3T is located on a  $2/m$  position. A 3T molecule has a two-fold axis, but the mirror plane makes two possible orientations. Since two disordered orientations are seemingly intrinsic, in the present work, the crystal structure is solved assuming the space group of  $C2$ . The interplanar distance between the 3T and TCNQ molecules is 3.36 Å. The stacking axis is by 20° tilted from normal to the molecular planes.

Crystal qualities of (4T)(F<sub>2</sub>TCNQ) and (4T)(F<sub>4</sub>TCNQ) are not sufficient, but (4T)(F<sub>2</sub>TCNQ) is isostructural to (4T)(TCNQ).<sup>51</sup> (4T)(F<sub>4</sub>TCNQ) also has basically the same stacking structure as these complexes as well as (dimethyl-4T)(F<sub>4</sub>TCNQ) (Table S1).<sup>60</sup> The *a* axis and lattice angles of (4T)(F<sub>4</sub>TCNQ) are, however, considerably different from the others. The overlap modes (Figs. S1(d), (f), and (h)) are quite similar, but when the stacks are viewed along the same direction, the cells are significantly different (Figs. S1(c), (e), and (g)). This indicates that the column structures are basically the same, but the arrangements of the adjacent columns are meaningfully different in the F<sub>4</sub>TCNQ complex. The 4T and TCNQ molecules are located on inversion centers without any disorder. The 4T and F<sub>*n*</sub>TCNQ molecules are alternately stacked with interplanar distances of 3.37, 3.33, and 3.31 Å, respectively for *n* = 0, 2 and 4.

**Table S1** Crystallographic data of F<sub>n</sub>TCNQ complexes of 3T and 4T.

|                                                                              | (3T)(TCNQ)                                                    | (4T)(TCNQ)                                                    | (4T)(F <sub>2</sub> TCNQ)                                                    | (4T)(F <sub>4</sub> TCNQ) <sup>a</sup>                                       |
|------------------------------------------------------------------------------|---------------------------------------------------------------|---------------------------------------------------------------|------------------------------------------------------------------------------|------------------------------------------------------------------------------|
| Formula                                                                      | C <sub>24</sub> H <sub>12</sub> N <sub>4</sub> S <sub>3</sub> | C <sub>28</sub> H <sub>14</sub> N <sub>4</sub> S <sub>4</sub> | C <sub>28</sub> H <sub>12</sub> F <sub>2</sub> N <sub>4</sub> S <sub>4</sub> | C <sub>28</sub> H <sub>10</sub> F <sub>4</sub> N <sub>4</sub> S <sub>4</sub> |
| Formula weight                                                               | 452.57                                                        | 534.69                                                        | 570.67                                                                       | 606.65                                                                       |
| Crystal System                                                               | monoclinic                                                    | triclinic                                                     | triclinic                                                                    | triclinic                                                                    |
| Space Group                                                                  | C2                                                            | P-1                                                           | P-1                                                                          | P-1                                                                          |
| Shape                                                                        | black needle                                                  | black needle                                                  | black needle                                                                 | black needle                                                                 |
| <i>a</i> (Å)                                                                 | 10.970(5)                                                     | 7.861(4)                                                      | 7.9104(5)                                                                    | 9.092(5)                                                                     |
| <i>b</i> (Å)                                                                 | 12.704(4)                                                     | 8.890(3)                                                      | 8.8995(6)                                                                    | 9.151(4)                                                                     |
| <i>c</i> (Å)                                                                 | 7.754(3)                                                      | 10.291(8)                                                     | 10.3989(7)                                                                   | 10.403(6)                                                                    |
| <i>α</i> (deg.)                                                              | 90                                                            | 109.60(4)                                                     | 109.866(3)                                                                   | 90.88(5)                                                                     |
| <i>β</i> (deg.)                                                              | 101.29(3)                                                     | 109.29(5)                                                     | 109.641(3)                                                                   | 129.50(4)                                                                    |
| <i>γ</i> (deg.)                                                              | 90                                                            | 98.00(4)                                                      | 97.879(4)                                                                    | 104.63(4)                                                                    |
| <i>V</i> (Å <sup>3</sup> )                                                   | 1059.7(7)                                                     | 613.7(7)                                                      | 621.80(7)                                                                    | 628.0(7)                                                                     |
| <i>ρ</i> (g cm <sup>-3</sup> )                                               | 1.418                                                         | 1.447                                                         | 1.524                                                                        | 1.604                                                                        |
| <i>Z</i> -value                                                              | 2                                                             | 1                                                             | 1                                                                            | 1                                                                            |
| <i>T</i> (K)                                                                 | 298                                                           | 297                                                           | 271                                                                          | 297                                                                          |
| Total reflns.                                                                | 1697                                                          | 4191                                                          | 6801                                                                         | 2801                                                                         |
| Unique reflns. ( <i>R</i> <sub>int</sub> )                                   | 1407 (0.0229)                                                 | 3571 (0.0684)                                                 | 2009 (0.0779)                                                                | 2210 (0.0931)                                                                |
| <i>R</i> <sub>1</sub> [ <i>F</i> <sup>2</sup> > 2σ( <i>F</i> <sup>2</sup> )] | 0.0431                                                        | 0.0624                                                        | 0.1030                                                                       | 0.0919                                                                       |
| <i>wR</i> <sub>2</sub> [All reflns.]                                         | 0.1230                                                        | 0.1952                                                        | 0.3315                                                                       | 0.3090                                                                       |
| GOF                                                                          | 0.975                                                         | 0.999                                                         | 1.096                                                                        | 1.037                                                                        |

<sup>a</sup> (4T)(F<sub>4</sub>TCNQ) cell parameters are not the standard triclinic form to facilitate comparison with other 4T complexes. The standard triclinic form is as follows: *a*' = 8.400(5) Å, *b*' = 9.092(5) Å, *c*' = 9.151(4) Å, *α*' = 75.37(4) °, *β*' = 73.00(4) °, and *γ*' = 72.86(4) °, where *a* = -*b*', *b* = *c*', and *c* = *b*' - *a*' is the transformation matrix.

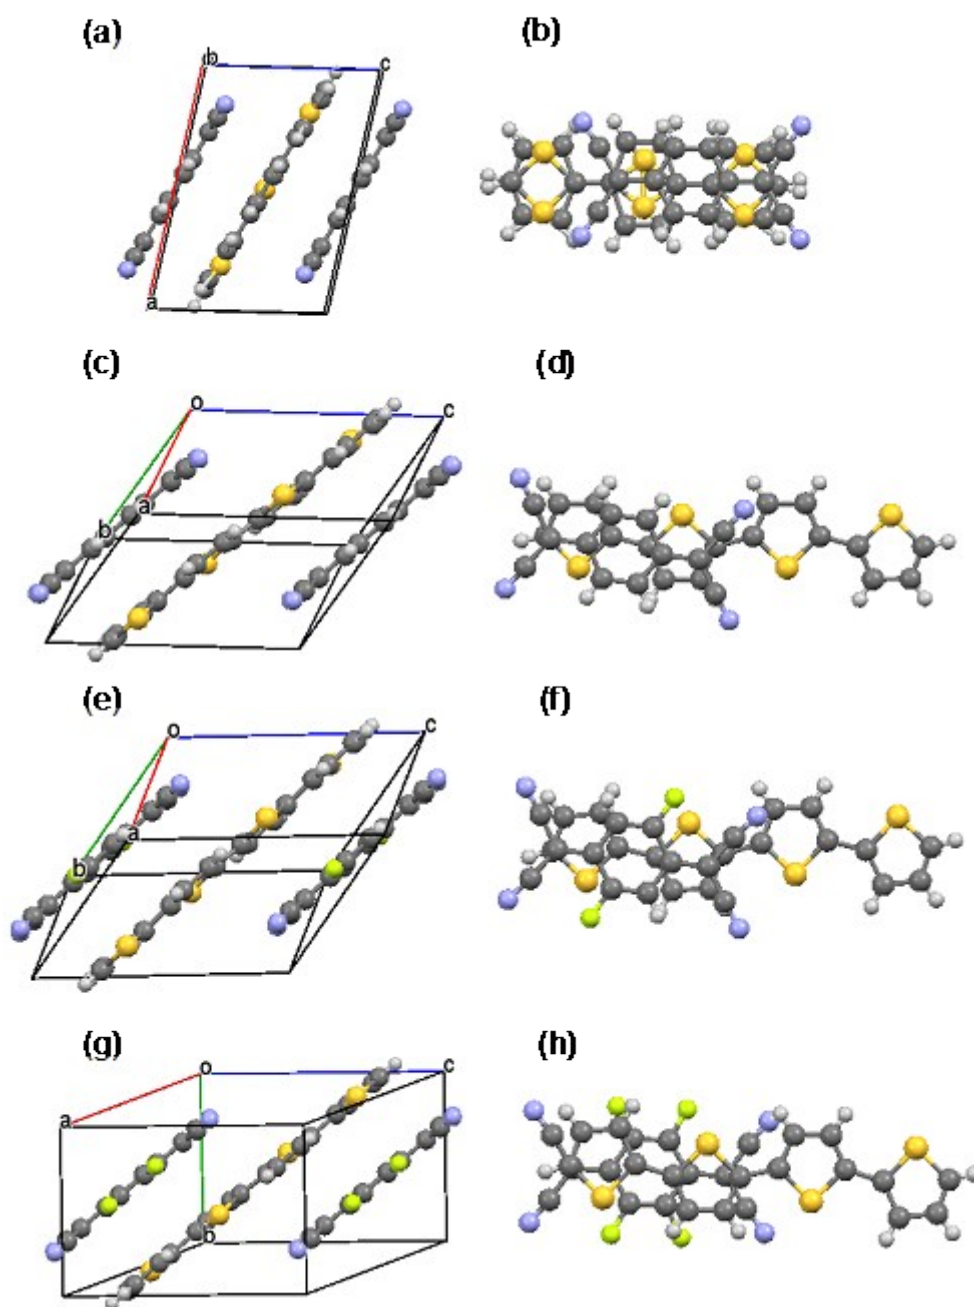

**Fig. S1** (a) Mixed-stack column, and (b) donor-acceptor overlap in (3T)(TCNQ). (c) Mixed-stack column, and (d) donor-acceptor overlap in (4T)(TCNQ). (e) Mixed-stack column, and (f) donor-acceptor overlap in (4T)(F<sub>2</sub>TCNQ). (g) Mixed-stack column, and (h) donor-acceptor overlap in (4T)(F<sub>4</sub>TCNQ).

## Degree of charge transfer

The charge transfer degrees  $\rho$  of the CT complexes were estimated from the bond lengths  $a \sim d$  and the C $\equiv$ N stretching mode  $\nu_{\text{C}\equiv\text{N}}$  of the TCNQ derivatives in the IR spectra as listed in Table S2 by using the following formula.<sup>S3,S4</sup>

$$\rho_{\text{BL}} = -26.28 + 27.94[(a + c)/(b + d)]$$

$$\nu_{\text{C}\equiv\text{N}} = 2227 - 44\rho_{\text{IR}}$$

**Table S2** Bond lengths, the C $\equiv$ N stretching mode, and the resulting  $\rho$  of the CT complexes.

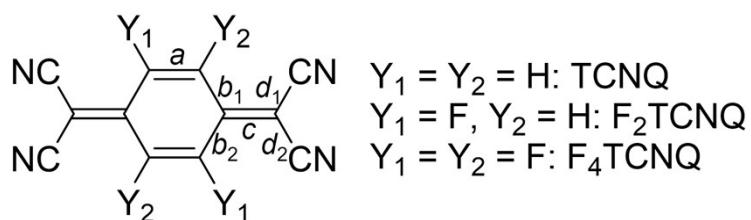

|                                                    | (3T)(TCNQ)  | (4T)(TCNQ)  | (4T)(F <sub>2</sub> TCNQ) | (4T)(F <sub>4</sub> TCNQ) |
|----------------------------------------------------|-------------|-------------|---------------------------|---------------------------|
| $a$ (Å) <sup>a</sup>                               | 1.365/1.317 | 1.345       | 1.355                     | 1.357                     |
| $b$ (Å) <sup>a</sup>                               | 1.475/1.400 | 1.434/1.435 | 1.443/1.425               | 1.441/1.414               |
| $c$ (Å)                                            | 1.388       | 1.388       | 1.378                     | 1.383                     |
| $d$ (Å) <sup>a</sup>                               | 1.408/1.449 | 1.425/1.433 | 1.441/1.436               | 1.432/1.448               |
| $\rho_{\text{BL}}$                                 | 0.32        | 0.39        | 0.30                      | 0.42                      |
| $\nu_{\text{C}\equiv\text{N}}$ (cm <sup>-1</sup> ) | 2215.32     | 2215.32     | 2218.21                   | 2219.18                   |
| $\rho_{\text{IR}}$                                 | 0.27        | 0.27        | 0.20                      | 0.18                      |

<sup>a</sup> For  $a$ ,  $b$  and  $d$ , average of the two distances was used.

## Cyclic Voltammetry (CV)

Redox potentials were measured by cyclic voltammetry (CV) on an ALS model 701E electrochemical analyzer using dry acetonitrile as a solvent and tetrabutylammonium hexafluorophosphate as an electrolyte. The working electrode was glassy carbon, and the counter electrode was platinum. Ag in a 0.01 M AgNO<sub>3</sub> solution was used as a reference electrode. The LUMO levels were estimated from the first half-wave reduction (F<sub>n</sub>TCNQ) potentials by assuming the reference energy level of ferrocene/ferrocenium (Fc/Fc<sup>+</sup>:  $E^{1/2}$  = +0.195 V vs. Ag/AgNO<sub>3</sub> measured under the identical conditions) to be 4.8 eV from the vacuum level.<sup>S5</sup> These values are in excellent agreement with the reported values listed in the parentheses.<sup>63,S6-S8</sup>

**Table S3** Redox potentials, and the energy levels.

|                     | $E^{1/2}$ (V) | $E_{\text{HOMO/LUMO}}$ (eV)    |
|---------------------|---------------|--------------------------------|
| 3T                  | –             | (–5.49) <sup>63</sup>          |
| 4T                  | –             | (–5.41) <sup>63</sup>          |
| TCNQ                | –0.19         | –4.61 (–4.60) <sup>S6-S8</sup> |
| F <sub>2</sub> TCNQ | –0.01         | –4.79 (–4.85) <sup>S6-S8</sup> |
| F <sub>4</sub> TCNQ | 0.18          | –4.98 (–5.06) <sup>S6-S8</sup> |

## Partition method

In order to investigate signs of the different contributions, two bridge orbitals with the energies  $E_1$  and  $E_2$  are considered. The secular equation for the triad is as follows.

$$\begin{vmatrix} E_0 - E & t & t' & 0 \\ t & E_1 - E & 0 & t \\ t' & 0 & E_2 - E & t' \\ 0 & t & t' & E_0 - E \end{vmatrix} = 0 \quad (\text{S1})$$

The shift of the starting orbital energy,  $E_0 - E$ , in the first and fourth lines, is substituted by  $2t^{eff}$ .

The diagonal terms,  $E_i - E$ , of the second and third lines are approximated by  $E_i - E_0$  ( $i = 1$  and  $2$ ), because  $E_i - E$  is much larger than  $2t^{eff}$ . Then, this determinant is solved to give

$$t^{eff} = \frac{t^2}{E_1 - E_0} + \frac{t'^2}{E_2 - E_0}. \quad (\text{S2})$$

If the bridge orbital with energy  $E_2$  has an opposite parity (Figure S1), we have to examine a secular equation with different signs of  $t'$ .

$$\begin{vmatrix} E_0 - E & t & t' & 0 \\ t & E_1 - E & 0 & t \\ t' & 0 & E_2 - E & -t' \\ 0 & t & -t' & E_0 - E \end{vmatrix} = 0 \quad (\text{S3})$$

This equation similarly affords the relation in which the first and second terms have opposite signs.

$$t^{eff} = \frac{t^2}{E_1 - E_0} - \frac{t'^2}{E_2 - E_0} \quad (\text{S4})$$

We can determine the signs from the parity of the bridge orbitals (Fig. S2). In addition, the sign changes depending on the sign of the denominator.

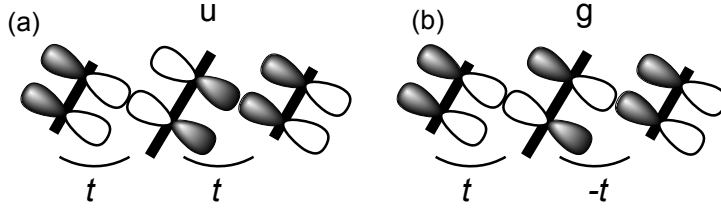

**Fig. S2** Parity of bridge orbitals.

In order to confirm these relations, energy bands of the same situation are calculated. The energy band is obtained from the following secular equation.<sup>59</sup>

$$\begin{vmatrix} E_0 - E & 2t \cos ka & 2t' \cos ka \\ 2t \cos ka & E_1 - E & 0 \\ 2t' \cos ka & 0 & E_2 - E \end{vmatrix} = 0 \quad (\text{S5})$$

$E_1 - E$  and  $E_2 - E$  are respectively approximated by  $E_1 - E_0$  and  $E_2 - E_0$  to give

$$E_0 - E = \left( \frac{4t^2}{E_1 - E_0} + \frac{4t'^2}{E_2 - E_0} \right) \cos^2 ka = 2 \left( \frac{t^2}{E_1 - E_0} + \frac{t'^2}{E_2 - E_0} \right) \cos 2ka + \text{const.} \quad (\text{S6})$$

so that  $t^{\text{eff}}$  is given by eqn (S2). An example of the energy band is shown in Fig. S3(a). When the red band is regarded as TCNQ LUMO band, the bandwidth  $4t^{\text{eff}}$  is determined by the transfer to the donor bridge orbitals. The calculated bandwidth (0.34 eV) is slightly smaller than the expectation from eqn (S2) (0.53 eV) because  $E_i - E$  is not approximated to be  $E_i - E_0$  in the band calculation.

When the two bridge orbitals have different kinds of parity,

$$\begin{vmatrix} E_0 - E & 2t \cos ka & 2t' i \sin ka \\ 2t \cos ka & E_1 - E & 0 \\ -2t' i \sin ka & 0 & E_2 - E \end{vmatrix} = 0 \quad (\text{S7})$$

gives



$$\begin{aligned}
E_0 - E &= \frac{4t^2}{E_1 - E_0} \cos^2 ka + \frac{4t'^2}{E_2 - E_0} \sin^2 ka \\
&= 2 \left( \frac{t^2}{E_1 - E_0} - \frac{t'^2}{E_2 - E_0} \right) \cos 2ka + \text{const.}
\end{aligned} \tag{S8}$$

so eqn (S4) affords the bandwidth. The energy band in Fig. S3(b) represents the case of entire cancellation due to the same magnitude of even and odd parity transfers.

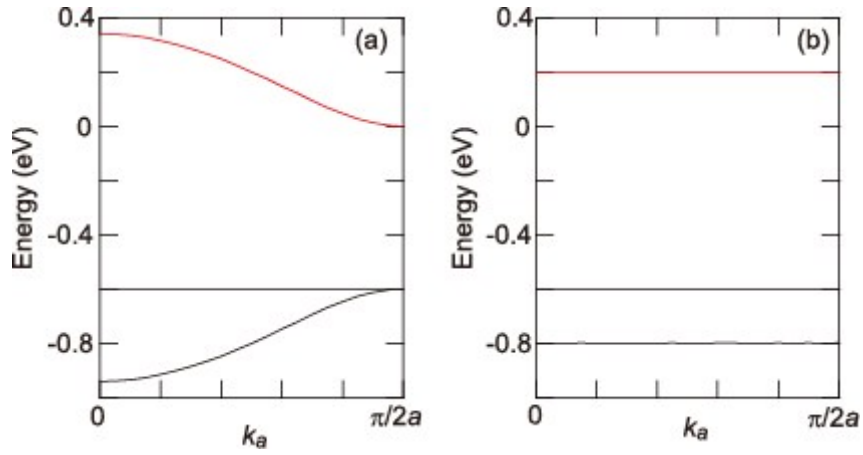

**Fig. S3** Tight-binding energy band with two bridge orbitals with (a) even, and (b) odd parity.

Parameters are  $E_0 = 0$ ,  $E_1 = E_2 = -0.6$  eV, and  $t = t' = 0.2$  eV.

Energy levels of (4T)(TCNQ) monomers, dimers, and trimers are depicted in Fig. S4. In the complexes, D levels shift downward and A levels shift upward reflecting the charge transfer, and the D H/A L gap becomes 1 ~ 2 eV. The shift is regarded as approximately parallel. In the present partition calculations,  $E_i - E_0$  is taken from the ADA triad energy levels.

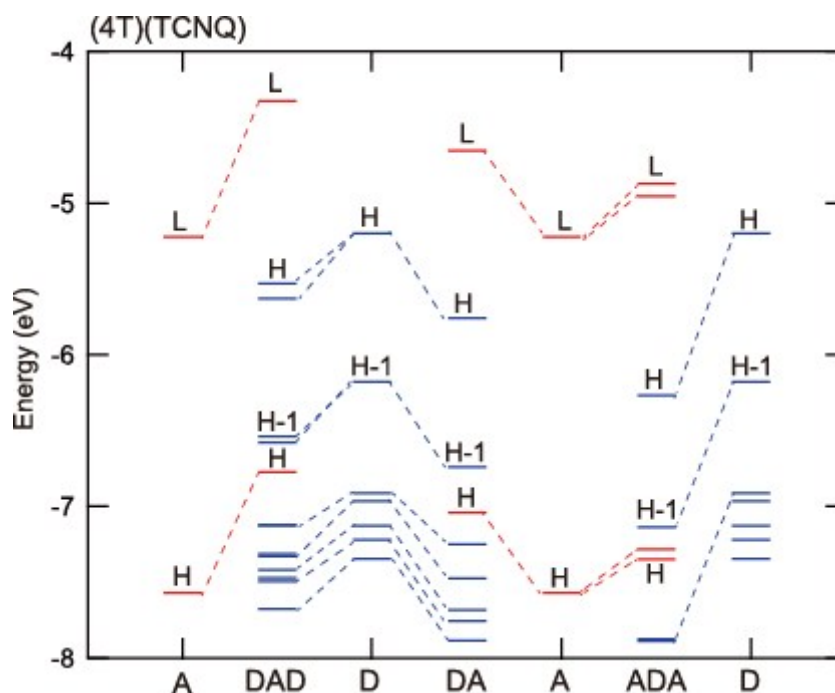

**Fig. S4** Energy levels of (4T)(TCNQ) monomers, dimer, and trimers.

The partition calculations are listed in Tables S4 to S10. In (tetracene)(TCNQ), practically a single bridge orbital participates in the conduction: D H-1 for electrons and A H-1 for holes (Table S4). Electron conduction through D H-4 is by one order smaller than the H-1 conduction. In m-(tetracene)(TCNQ), several transfers are exactly zero owing to the symmetry, but the situation is not much different in t-(tetracene)(TCNQ) and (tetracene)(F<sub>4</sub>TCNQ).

(Anthracene)(TCNQ) is in the same situation (Table S5), but the H/L interaction increases with lowering the temperature. Interestingly,  $\tau_h^{\text{eff}}$  once increases at 155 K, but decreases at 100

K (Table 2); this is in agreement with the observation of hole transport at the intermediate temperatures, but restoration of electron conduction at 100 K.<sup>42</sup> This happens due to the cancellation of the A L and H-1 contributions at 100 K (Table S5).

The results of (chrysene)(TCNQ) are in basic agreement with Ref. 45 (Table S6). For hole conduction, the L and H-1 pathways cancel each other. In (coronene)(TCNQ) and (coronene)(F<sub>4</sub>TCNQ), two sets of molecular orbitals, H/H-1 and H-1/H-2, are approximately degenerate. Due to the cancellation between H-1 and H-3, the obtained  $t_e^{\text{eff}}$  is small (Table S6), but if this mechanism does not work, electron conduction is much more dominant.

In (BTBT)(F<sub>n</sub>TCNQ), (DMeOBTBT)(F<sub>n</sub>TCNQ), and (DBPP)(DMTCNQ), the H-1 conduction is overwhelmingly important, and these complexes show electron conduction (Table S7).

The H/L interaction is most important in (DBTTF)(TCNQ) and (DBPP)(DMDCNQI), and these complexes exhibit ambipolar properties (Table S8).

In (4T)(F<sub>n</sub>TCNQ), the H-1 transfer is as large as the H/L transfer (Table S9) because the H-1 transfer also has stripe symmetry (Fig. 5). These two orbitals have different parity and cancel the electron transport so that the hole transport is larger than the electron transport. This mechanism is less important in (fnT)(TCNQ), and these complexes are more close to the ambipolar transport. In (DPTTA)(F<sub>n</sub>TCNQ), hole transport is larger than electron transport due to the cancellation of the H and H-3 contributions for electron transport. Including (DP-P2P)(CyhNDI), these complexes are essentially ambipolar, though electron/hole dominance is derived from the sensitive balance of the bridge orbitals.

**Table S4** Energy difference, transfers, and contributions to superexchange transfers (meV) in the partition calculation of (tetracene)(F<sub>n</sub>TCNQ).

(a) m-(tetracene)(TCNQ)

| Electron |             |     |                   | Hole |             |     |                   |
|----------|-------------|-----|-------------------|------|-------------|-----|-------------------|
| A L→     | $E_i - E_0$ | $t$ | $t^2/(E_i - E_0)$ | D H→ | $E_i - E_0$ | $t$ | $t^2/(E_i - E_0)$ |
| H        | 710         | 0   | 0                 | L    | -710        | 0   | 0                 |
| H-1      | 2018        | 282 | 39                | H    | 1639        | 0   | 0                 |
| H-2      | 2210        | 0   | 0                 | H-1  | 3215        | 199 | -12               |
| H-3      | 3126        | 0   | 0                 |      |             |     |                   |
| H-4      | 3455        | 107 | -3                |      |             |     |                   |
| Total    |             |     | 36                |      |             |     | -12               |

(b) t-(tetracene)(TCNQ)

| Electron |             |     |                   | Hole |             |     |                   |
|----------|-------------|-----|-------------------|------|-------------|-----|-------------------|
| A L→     | $E_i - E_0$ | $t$ | $t^2/(E_i - E_0)$ | D H→ | $E_i - E_0$ | $t$ | $t^2/(E_i - E_0)$ |
| H        | 710         | 14  | 0                 | L    | -710        | 14  | 0                 |
| H-1      | 2018        | 313 | 49                | H    | 1639        | 51  | 2                 |
| H-2      | 2210        | 14  | 0                 | H-1  | 3215        | 221 | -15               |
| H-3      | 3126        | 34  | 0                 |      |             |     |                   |
| H-4      | 3455        | 113 | -4                |      |             |     |                   |
| Total    |             |     | 46                |      |             |     | -13               |

(c) (tetracene)(F<sub>4</sub>TCNQ)

| Electron |             |     |                   | Hole |             |     |                   |
|----------|-------------|-----|-------------------|------|-------------|-----|-------------------|
| A L→     | $E_i - E_0$ | $t$ | $t^2/(E_i - E_0)$ | D H→ | $E_i - E_0$ | $t$ | $t^2/(E_i - E_0)$ |
| H        | 1122        | 99  | 9                 | L    | -1122       | 99  | 9                 |
| H-1      | 2127        | 317 | 47                | H    | 1117        | 60  | 3                 |
| H-2      | 2182        | 72  | -2                | H-1  | 1982        | 201 | -20               |
| H-3      | 2359        | 45  | 1                 |      |             |     |                   |
| H-4      | 2711        | 73  | -2                |      |             |     |                   |
| Total    |             |     | 52                |      |             |     | -8                |

**Table S5** Energy difference, transfers, and contributions to superexchange transfers (meV) in the partition calculation of (anthracene)(TCNQ).

(a) 300 K

| Electron |             |     |                   | Hole |             |     |                   |
|----------|-------------|-----|-------------------|------|-------------|-----|-------------------|
| A L→     | $E_i - E_0$ | $t$ | $t^2/(E_i - E_0)$ | D H→ | $E_i - E_0$ | $t$ | $t^2/(E_i - E_0)$ |
| H        | 1305        | 0   | 0                 | L    | -1305       | 0   | 0                 |
| H-1      | 2410        | 309 | 40                | H    | 1044        | 0   | 0                 |
| H-2      | 2999        | 0   | 0                 | H-1  | 2620        | 271 | -28               |
| Total    |             |     | 40                |      |             |     | -28               |

  

| A L→  | $E_i - E_0$ | $t$ | $t^2/(E_i - E_0)$ | D H→ | $E_i - E_0$ | $t$ | $t^2/(E_i - E_0)$ |
|-------|-------------|-----|-------------------|------|-------------|-----|-------------------|
| H     | 1305        | 50  | 2                 | L    | -1305       | 50  | 2                 |
| H-1   | 2410        | 302 | 38                | H    | 1044        | 15  | 0                 |
| H-2   | 2999        | 6   | 0                 | H-1  | 2620        | 283 | -31               |
| Total |             |     | 40                |      |             |     | -29               |

(b) 155 K

| Electron |             |     |                   | Hole |             |     |                   |
|----------|-------------|-----|-------------------|------|-------------|-----|-------------------|
| A L→     | $E_i - E_0$ | $t$ | $t^2/(E_i - E_0)$ | D H→ | $E_i - E_0$ | $t$ | $t^2/(E_i - E_0)$ |
| H        | 1305        | 103 | 8                 | L    | -1305       | 103 | 8                 |
| H-1      | 2410        | 322 | 43                | H    | 1044        | 43  | 2                 |
| H-2      | 2999        | 35  | 0                 | H-1  | 2620        | 307 | -36               |
| Total    |             |     | 50                |      |             |     | -26               |

  

| A L→  | $E_i - E_0$ | $t$ | $t^2/(E_i - E_0)$ | D H→ | $E_i - E_0$ | $t$ | $t^2/(E_i - E_0)$ |
|-------|-------------|-----|-------------------|------|-------------|-----|-------------------|
| H     | 1305        | 28  | 1                 | L    | -1305       | 28  | 1                 |
| H-1   | 2410        | 338 | 48                | H    | 1044        | 34  | 1                 |
| H-2   | 2999        | 33  | 0                 | H-1  | 2620        | 284 | -29               |
| Total |             |     | 48                |      |             |     | -27               |

(c) 100 K

| Electron |             |     |                   | Hole |             |     |                   |
|----------|-------------|-----|-------------------|------|-------------|-----|-------------------|
| A L→     | $E_i - E_0$ | $t$ | $t^2/(E_i - E_0)$ | D H→ | $E_i - E_0$ | $t$ | $t^2/(E_i - E_0)$ |
| H        | 1305        | 158 | 19                | L    | -1305       | 158 | 19                |
| H-1      | 2410        | 305 | 39                | H    | 1044        | 50  | 2                 |
| H-2      | 2999        | 60  | -1                | H-1  | 2620        | 255 | -25               |
| Total    |             |     | 56                |      |             |     | -3                |

  

| A L→  | $E_i - E_0$ | $t$ | $t^2/(E_i - E_0)$ | D H→ | $E_i - E_0$ | $t$ | $t^2/(E_i - E_0)$ |
|-------|-------------|-----|-------------------|------|-------------|-----|-------------------|
| H     | 1305        | 151 | 17                | L    | -1305       | 151 | 17                |
| H-1   | 2410        | 297 | 37                | H    | 1044        | 28  | 1                 |
| H-2   | 2999        | 45  | -1                | H-1  | 2620        | 273 | -29               |
| Total |             |     | 53                |      |             | 1   | -10               |

**Table S6** Energy difference, transfers, and contributions to superexchange transfers (meV) in the partition calculation of (chrysene)(TCNQ) and (coronene)(F<sub>n</sub>TCNQ).

(a) (chrysene)(TCNQ)

| Electron |             |     |                   | Hole |             |     |                   |
|----------|-------------|-----|-------------------|------|-------------|-----|-------------------|
| A L→     | $E_i - E_0$ | $t$ | $t^2/(E_i - E_0)$ | D H→ | $E_i - E_0$ | $t$ | $t^2/(E_i - E_0)$ |
| L        | -2414       | 97  | 4                 | L    | -1481       | 84  | 5                 |
| H        | 1481        | 84  | 5                 | H    | 867         | 53  | 3                 |
| H-1      | 2105        | 351 | 59                | H-1  | 2443        | 110 | -5                |
| H-2      | 2250        | 103 | -5                |      |             |     |                   |
| H-3      | 3142        | 132 | -6                |      |             |     |                   |
| Total    |             |     | 57                |      |             |     | 3                 |

(b) (coronene)(TCNQ)

| Electron |             |     |                   | Hole |             |     |                   |
|----------|-------------|-----|-------------------|------|-------------|-----|-------------------|
| A L→     | $E_i - E_0$ | $t$ | $t^2/(E_i - E_0)$ | D H→ | $E_i - E_0$ | $t$ | $t^2/(E_i - E_0)$ |
| L        | -2134       | 38  | 1                 | L    | -1515       | 3   | 0                 |
| H        | 1515        | 3   | 0                 | H    | 833         | 83  | 8                 |
| H-1      | 1627        | 286 | 50                | H-1  | 2409        | 1   | 0                 |
| H-2      | 2179        | 38  | -1                |      |             |     |                   |
| H-3      | 2311        | 290 | -36               |      |             |     |                   |
| Total    |             |     | 14                |      |             |     | 8                 |

(c) (coronene)(F<sub>4</sub>TCNQ)

| Electron |             |     |                   | Hole |             |     |                   |
|----------|-------------|-----|-------------------|------|-------------|-----|-------------------|
| A L→     | $E_i - E_0$ | $t$ | $t^2/(E_i - E_0)$ | D H→ | $E_i - E_0$ | $t$ | $t^2/(E_i - E_0)$ |
| L        | -2330       | 31  | 0                 | L    | -1319       | 134 | 14                |
| H        | 1319        | 134 | 14                | H    | 920         | 21  | 0                 |
| H-1      | 1404        | 285 | 58                | H-1  | 1786        | 60  | -2                |
| H-2      | 2138        | 118 | -7                |      |             |     |                   |
| H-3      | 2267        | 323 | -46               |      |             |     |                   |
| Total    |             |     | 19                |      |             |     | 11                |

**Table S7** Energy difference, transfers, and contributions to superexchange transfers (meV) in the partition calculation of (BTBT)(F<sub>n</sub>TCNQ), (DMeOBTBT)(F<sub>n</sub>TCNQ), and (DBPP)(DMTCNQ).

(a) (BTBT)(TCNQ)

| Electron |             |     |                   | Hole |             |     |                   |
|----------|-------------|-----|-------------------|------|-------------|-----|-------------------|
| A L→     | $E_i - E_0$ | $t$ | $t^2/(E_i - E_0)$ | D H→ | $E_i - E_0$ | $t$ | $t^2/(E_i - E_0)$ |
| H        | 1568        | 15  | 0                 | L    | -1568       | 15  | 0                 |
| H-1      | 2075        | 341 | 56                | H    | 781         | 7   | 6                 |
| H-2      | 2312        | 63  | -2                | H-1  | 2356        | 45  | -1                |
| H-3      | 2420        | 146 | -9                |      |             |     |                   |
| Total    |             |     | 46                |      |             |     | 5                 |

(b) (BTBT)(F<sub>2</sub>TCNQ)

| Electron |             |     |                   | Hole |             |     |                   |
|----------|-------------|-----|-------------------|------|-------------|-----|-------------------|
| A L→     | $E_i - E_0$ | $t$ | $t^2/(E_i - E_0)$ | D H→ | $E_i - E_0$ | $t$ | $t^2/(E_i - E_0)$ |
| H        | 1447        | 18  | 0                 | L    | -1447       | 18  | 0                 |
| H-1      | 1929        | 349 | 63                | H    | 889         | 43  | 2                 |
| H-2      | 2191        | 76  | -3                | H-1  | 2029        | 61  | -2                |
| H-3      | 2342        | 138 | -8                |      |             |     |                   |
| Total    |             |     | 53                |      |             |     | 0                 |

(c) (BTBT)(F<sub>4</sub>TCNQ)

| Electron |             |     |                   | Hole |             |     |                   |
|----------|-------------|-----|-------------------|------|-------------|-----|-------------------|
| A L→     | $E_i - E_0$ | $t$ | $t^2/(E_i - E_0)$ | D H→ | $E_i - E_0$ | $t$ | $t^2/(E_i - E_0)$ |
| H        | 1403        | 14  | 0                 | L    | -1403       | 14  | 0                 |
| H-1      | 1874        | 370 | 73                | H    | 837         | 47  | 3                 |
| H-2      | 2215        | 78  | -3                | H-1  | 1702        | 33  | -1                |
| H-3      | 2345        | 164 | -11               |      |             |     |                   |
| Total    |             |     | 59                |      |             |     | 2                 |

(d) (DMeOBTBT)(TCNQ)

| Electron |             |     |                   | Hole |             |     |                   |
|----------|-------------|-----|-------------------|------|-------------|-----|-------------------|
| A L→     | $E_i - E_0$ | $t$ | $t^2/(E_i - E_0)$ | D H→ | $E_i - E_0$ | $t$ | $t^2/(E_i - E_0)$ |
| L        | -1156       | 20  | 4                 | L    | -1446       | 313 | 68                |
| H        | 1446        | 313 | 68                | H    | 902         | 140 | 22                |
| H-1      | 1614        | 15  | 0                 | H-1  | 2478        | 96  | -4                |
| H-2      | 1946        | 117 | -7                |      |             |     |                   |
| Total    |             |     | 65                |      |             |     | 86                |



(e) (DMeOBTBT)(F<sub>2</sub>TCNQ)

| Electron |             |     |                   | Hole |             |     |                   |
|----------|-------------|-----|-------------------|------|-------------|-----|-------------------|
| A L→     | $E_i - E_0$ | $t$ | $t^2/(E_i - E_0)$ | D H→ | $E_i - E_0$ | $t$ | $t^2/(E_i - E_0)$ |
| H        | 1247        | 69  | 4                 | L    | -1247       | 69  | 4                 |
| H-1      | 1558        | 328 | 69                | H    | 886         | 68  | 5                 |
| H-2      | 1614        | 33  | -1                | H-1  | 2030        | 57  | -2                |
| H-3      | 2278        | 163 | -12               |      |             |     |                   |
| Total    |             |     | 60                |      |             |     | 7                 |

(f) (DMeOBTBT)(F<sub>4</sub>TCNQ)

| Electron |             |     |                   | Hole |             |     |                   |
|----------|-------------|-----|-------------------|------|-------------|-----|-------------------|
| A L→     | $E_i - E_0$ | $t$ | $t^2/(E_i - E_0)$ | D H→ | $E_i - E_0$ | $t$ | $t^2/(E_i - E_0)$ |
| H        | 1142        | 44  | 2                 | L    | -1142       | 44  | 2                 |
| H-1      | 1477        | 339 | 78                | H    | 1098        | 53  | 3                 |
| H-2      | 1496        | 28  | -1                | H-1  | 1963        | 46  | -1                |
| H-3      | 2231        | 187 | -16               |      |             |     |                   |
| Total    |             |     | 63                |      |             |     | 3                 |

## (g) (DBPP)(DMTCNQ)

| Electron |             |     |                   | Hole |             |     |                   |
|----------|-------------|-----|-------------------|------|-------------|-----|-------------------|
| A L→     | $E_i - E_0$ | $t$ | $t^2/(E_i - E_0)$ | D H→ | $E_i - E_0$ | $t$ | $t^2/(E_i - E_0)$ |
| H        | 1115        | 172 | 26                | L    | -1115       | 172 | 26                |
| H-1      | 1840        | 319 | 55                | H    | 987         | 28  | 1                 |
| H-2      | 2028        | 47  | 1                 | H-1  | 2066        | 139 | -9                |
| H-3      | 2090        | 194 | -18               |      |             |     |                   |
| Total    |             |     | 65                |      |             |     | 18                |

**Table S8** Energy difference, transfers, and contributions to superexchange transfers (meV) in the partition calculation of (DBTTF)(TCNQ) and (DBPP)(DMDCNQI).

(a) (DBTTF)(TCNQ)

| Electron |             |     |                   | Hole |             |     |                   |
|----------|-------------|-----|-------------------|------|-------------|-----|-------------------|
| A L→     | $E_i - E_0$ | $t$ | $t^2/(E_i - E_0)$ | D H→ | $E_i - E_0$ | $t$ | $t^2/(E_i - E_0)$ |
| L+1      | -2482       | 81  | 3                 | L    | -1059       | 205 | 40                |
| L        | -2089       | 0   | 0                 | H    | 2178        | 78  | 3                 |
| H        | 1059        | 205 | 40                | H-1  | 2455        | 21  | 0                 |
| H-1      | 2762        | 17  | 0                 |      |             |     |                   |
| H-2      | 2847        | 72  | -2                |      |             |     |                   |
| H-3      | 2946        | 177 | -10               |      |             |     |                   |
| Total    |             |     | 30                |      |             |     | 42                |

(b) (DBPP)(DMDCNQI)

| Electron |             |     |                   | Hole |             |     |                   |
|----------|-------------|-----|-------------------|------|-------------|-----|-------------------|
| A L→     | $E_i - E_0$ | $t$ | $t^2/(E_i - E_0)$ | D H→ | $E_i - E_0$ | $t$ | $t^2/(E_i - E_0)$ |
| H        | 1438        | 253 | 44                | L    | -1438       | 253 | 44                |
| H-1      | 2003        | 263 | 34                | H    | 1469        | 89  | 5                 |
| H-2      | 2647        | 18  | 0                 | H-1  | 2485        | 58  | -1                |
| H-3      | 2895        | 129 | -6                |      |             |     |                   |
| Total    |             |     | 73                |      |             |     | 48                |

**Table S9** Energy difference, transfers, and contributions to superexchange transfers (meV) in the partition calculation of (4T)(F<sub>n</sub>TCNQ), (DPTTA)(F<sub>n</sub>TCNQ), (fnT)(TCNQ), and (DP-P2P)(CyhNDI).

(a) (4T)(TCNQ)

| Electron |             |     |                   | Hole |             |     |                   |
|----------|-------------|-----|-------------------|------|-------------|-----|-------------------|
| A L→     | $E_i - E_0$ | $t$ | $t^2/(E_i - E_0)$ | D H→ | $E_i - E_0$ | $t$ | $t^2/(E_i - E_0)$ |
| H        | 1311        | 274 | 57                | L    | -1311       | 274 | 57                |
| H-1      | 2183        | 293 | -39               | H    | 1014        | 68  | 5                 |
| H-2      | 2920        | 34  | 0                 | H-1  | 2655        | 113 | -5                |
| H-3      | 2933        | 88  | -3                |      |             |     |                   |
| Total    |             |     | 16                |      |             |     | 57                |

(b) (4T)(F<sub>2</sub>TCNQ)

| Electron |             |     |                   | Hole |             |     |                   |
|----------|-------------|-----|-------------------|------|-------------|-----|-------------------|
| A L→     | $E_i - E_0$ | $t$ | $t^2/(E_i - E_0)$ | D H→ | $E_i - E_0$ | $t$ | $t^2/(E_i - E_0)$ |
| H        | 1212        | 285 | 67                | L    | -1212       | 285 | 67                |
| H-1      | 1907        | 277 | -40               | H    | 1120        | 43  | 2                 |
| H-2      | 2206        | 37  | 1                 | H-1  | 2264        | 14  | 0                 |
| H-3      | 2325        | 61  | -2                |      |             |     |                   |
| H-4      | 2843        | 89  | 3                 |      |             |     |                   |
| Total    |             |     | 29                |      |             |     | 69                |

(c) (4T)(F<sub>4</sub>TCNQ)

| Electron |             |     |                   | Hole |             |     |                   |
|----------|-------------|-----|-------------------|------|-------------|-----|-------------------|
| A L→     | $E_i - E_0$ | $t$ | $t^2/(E_i - E_0)$ | D H→ | $E_i - E_0$ | $t$ | $t^2/(E_i - E_0)$ |
| H        | 1119        | 280 | 70                | L    | -1119       | 280 | 70                |
| H-1      | 1879        | 276 | -40               | H    | 1230        | 37  | 1                 |
| H-2      | 2131        | 11  | 0                 | H-1  | 2806        | 113 | -5                |
| H-3      | 2264        | 78  | -3                |      |             |     |                   |
| Total    |             |     | 27                |      |             |     | 67                |

(d) (DPTTA)(F<sub>2</sub>TCNQ)

| Electron |             |     |                   | Hole |             |     |                   |
|----------|-------------|-----|-------------------|------|-------------|-----|-------------------|
| A L→     | $E_i - E_0$ | $t$ | $t^2/(E_i - E_0)$ | D H→ | $E_i - E_0$ | $t$ | $t^2/(E_i - E_0)$ |
| H        | 1212        | 156 | 20                | L    | -1212       | 156 | 20                |
| H-1      | 1907        | 42  | 1                 | H    | 1120        | 44  | 2                 |
| H-2      | 2206        | 3   | 0                 | H-1  | 2264        | 22  | 0                 |
| H-3      | 2325        | 169 | -12               |      |             |     |                   |
| Total    |             |     | 9                 |      |             |     | 22                |

(e) (DPTTA)(F<sub>4</sub>TCNQ)

| Electron |             |     |                   | Hole |             |     |                   |
|----------|-------------|-----|-------------------|------|-------------|-----|-------------------|
| A L→     | $E_i - E_0$ | $t$ | $t^2/(E_i - E_0)$ | D H→ | $E_i - E_0$ | $t$ | $t^2/(E_i - E_0)$ |
| H        | 1119        | 136 | 16                | L    | -1119       | 136 | 16                |
| H-1      | 1879        | 20  | 0                 | H    | 1121        | 28  | 1                 |
| H-2      | 2131        | 22  | 0                 | H-1  | 1986        | 16  | 0                 |
| H-3      | 2264        | 163 | -12               |      |             |     |                   |
| Total    |             |     | 5                 |      |             |     | 17                |

## (f) (f3T)(TCNQ)

| Electron |             |     |                   | Hole |             |     |                   |
|----------|-------------|-----|-------------------|------|-------------|-----|-------------------|
| A L→     | $E_i - E_0$ | $t$ | $t^2/(E_i - E_0)$ | D H→ | $E_i - E_0$ | $t$ | $t^2/(E_i - E_0)$ |
| H        | 1715        | 205 | 25                | L    | -1715       | 205 | 25                |
| H-1      | 1933        | 41  | 1                 | H    | 633         | 73  | 8                 |
| H-2      | 2229        | 124 | -7                | H-1  | 2209        | 59  | -2                |
| H-3      | 2421        | 91  | 3                 |      |             |     |                   |
| Total    |             |     | 22                |      |             |     | 31                |

## (g) (f4T)(TCNQ)

| Electron |             |     |                   | Hole |             |     |                   |
|----------|-------------|-----|-------------------|------|-------------|-----|-------------------|
| A L→     | $E_i - E_0$ | $t$ | $t^2/(E_i - E_0)$ | D H→ | $E_i - E_0$ | $t$ | $t^2/(E_i - E_0)$ |
| H        | 1643        | 344 | 72                | L    | -1643       | 344 | 72                |
| H-1      | 1972        | 25  | 0                 | H    | 705         | 94  | 13                |
| H-2      | 2279        | 132 | -8                | H-1  | 2281        | 79  | -3                |
| H-3      | 2428        | 51  | 1                 |      |             |     |                   |
| H-4      | 2694        | 129 | -6                |      |             |     |                   |
| Total    |             |     | 60                |      |             |     | 83                |

## (h) (DP-P2P)(CyhNDI)

| Electron |             |       |                   | Hole |             |       |                   |
|----------|-------------|-------|-------------------|------|-------------|-------|-------------------|
| A L→     | $E_i - E_0$ | $t^a$ | $t^2/(E_i - E_0)$ | D H→ | $E_i - E_0$ | $t^a$ | $t^2/(E_i - E_0)$ |
| L        | -1527       | 132   | 2                 | L+1  | -3568       | 49    | 2                 |
|          |             | -24   |                   |      |             | 145   |                   |
| H        | 1931        | -166  | -2                | L    | -1931       | -166  | -2                |
|          |             | 24    |                   |      |             | 24    |                   |
| H-1      | 2023        | 85    | -12               | H    | 1361        | 199   | -1                |
|          |             | -292  |                   |      |             | 9     |                   |
| H-2      | 3114        | 92    | -2                | H-1  | 1686        | -66   | -16               |
|          |             | -63   |                   |      |             | -400  |                   |
| Total    |             |       | -14               |      |             |       | -17               |

<sup>a</sup> Owing to the noncentrosymmetric molecules, two transfers are independent, and the contributions are given by  $t_1 t_2 / (E_i - E_0)$ .

**Table S10** Energy difference, transfers, and contributions to superexchange transfers (meV) in the partition calculation of PMDA complexes of tetracene and phenazine.

(a) (tetracene)(PMDA)

| Electron |             |     |                   | Hole |             |     |                   |
|----------|-------------|-----|-------------------|------|-------------|-----|-------------------|
| A L→     | $E_i - E_0$ | $t$ | $t^2/(E_i - E_0)$ | D H→ | $E_i - E_0$ | $t$ | $t^2/(E_i - E_0)$ |
| H        | 1751        | 283 | 46                | L    | -1751       | 283 | 46                |
| H-1      | 2877        | 13  | 0                 | H    | 2432        | 9   | 0                 |
| H-2      | 3216        | 6   | 0                 | H-1  | 2465        | 23  | 0                 |
| H-3      | 4074        | 319 | 25                |      |             |     |                   |
| Total    |             |     | 71                |      |             |     | 45                |

(b) (phenazine)(PMDA)

| Electron |             |     |                   | Hole |             |     |                   |
|----------|-------------|-----|-------------------|------|-------------|-----|-------------------|
| A L→     | $E_i - E_0$ | $t$ | $t^2/(E_i - E_0)$ | D H→ | $E_i - E_0$ | $t$ | $t^2/(E_i - E_0)$ |
| H        | 2747        | 233 | 20                | L    | -2747       | 233 | 20                |
| H-1      | 3249        | 41  | 1                 | H    | 1442        | 120 | 10                |
| H-2      | 3563        | 6   | 0                 | H-1  | 1552        | 57  | 2                 |
| H-3      | 3701        | 302 | 25                |      |             |     |                   |
| Total    |             |     | 45                |      |             |     | 32                |

## References

- S1 G. M. Sheldrick, *Acta Crystallogr. A* 2015, **71**, 3.
- S2 G. M. Sheldrick, *Acta Crystallogr. C* 2015, **71**, 3.
- S3 T. C. Umland, S. Allie, T. Kuhlmann, P. Coppens, *J. Phys. Chem.* 1988, **92**, 6456.
- S4 J. S. Chappell, A. N. Bloch, W. A. Bryden, M. Maxfield, T. O. Poehler, D. O. Cowan, *J. Am. Chem. Soc.* 1981, **103**, 2442.
- S5 M. L. Tang, A. D. Reichardt, P. Wei, Z. Bao, *J. Am. Chem. Soc.* 2009, **131**, 5264.
- S6 P. W. Kenny, T. H. Jozefiak, L. L. Miller, *J. Org. Chem.* 1988, **53**, 5007.
- S7 H. Ikegami, C. H. Chong, H. Yamochi, G. Saito, *Mol. Cryst. Liq. Cryst.* 2002, **382**, 21.
- S8 S. S. Pac, G. Saito, *J. Solid State Chem.* 2002, **168**, 486-496.
